1                   **Performance drift is a major barrier to the safe use of**  
2                   **machine learning in cardiac surgery**

3   Tim Dong MSc<sup>1</sup>, Shubhra Sinha MBBS<sup>1</sup>, Ben Zhai PhD<sup>3</sup>, Daniel P Fudulu, PhD<sup>1</sup>, Jeremy Chan  
4   MD<sup>1</sup>, Pradeep Narayan, FRCS(CTh)<sup>2</sup>, Andy Judge PhD<sup>1</sup>, Massimo Caputo MD<sup>1</sup>, Arnaldo  
5   Dimagli MD<sup>1</sup>, Umberto Benedetto PhD<sup>1</sup> and Gianni D. Angelini MD<sup>1</sup>.

6

7

8   <sup>1</sup>Bristol Heart Institute, Translational Health Sciences, University of Bristol

9   <sup>2</sup>Departement of Cardiac Surgery, Rabindranath Tagore International Institute of Cardiac  
10   Sciences, India

11   <sup>3</sup>School of Computing Science, Newcastle University

12

13

14   **Corresponding Author:**

15   Prof Gianni Angelini MD,

16   British Heart Foundation Professor of Cardiac Surgery

17   Level 7,

18   Bristol Heart Institute,

19   Bristol,

20   BS2 8HW.

21   Phone number: +441173423165

22   Email: [G.D.Angelini@bristol.ac.uk](mailto:G.D.Angelini@bristol.ac.uk)

23

24 **ABSTRACT**

25 **Objectives** The Society of Thoracic Surgeons (STS), and EuroSCORE II (ES II) risk scores,  
26 are the most commonly used risk prediction models for adult cardiac surgery post-operative  
27 in-hospital mortality. However, they are prone to miscalibration over time, and poor  
28 generalisation across datasets and their use remain controversial. It has been suggested that  
29 using Machine Learning (ML) techniques, a branch of Artificial intelligence (AI), may  
30 improve the accuracy of risk prediction. Despite increased interest, a gap in understanding the  
31 effect of dataset drift on the performance of ML over time remains a barrier to its wider use  
32 in clinical practice. Dataset drift occurs when a machine learning system underperforms  
33 because of a mismatch between the dataset it was developed and the data on which it is  
34 deployed. Here we analyse this potential concern in a large United Kingdom (UK) database.

35 **Methods:** A retrospective analyses of prospectively routinely gathered data on adult patients  
36 undergoing cardiac surgery in the UK between 2012-2019. We temporally split the data  
37 70:30 into a training and validation subset. ES II and five ML mortality prediction models  
38 were assessed for relationships between and within variable importance drift, performance  
39 drift and actual dataset drift using temporal and non-temporal invariant consensus scoring,  
40 combining geometric average results of all metrics as the Clinical Effective Metric (CEM).

41 **Results:** A total of 227,087 adults underwent cardiac surgery during the study period with a  
42 mortality rate of 2.76%. There was a strong evidence of decrease in overall performance  
43 across all models ( $p < 0.0001$ ). Xgboost (CEM 0.728 95CI: 0.728-0.729) and Random Forest  
44 (CEM 0.727 95CI 0.727-0.728) were the best overall performing models both temporally and  
45 non-temporally. ES II performed worst across all comparisons. Sharp changes in variable  
46 importance and dataset drift between 2017-10 to 2017-12, 2018-06 to 2018-07 and 2018-12  
47 to 2019-02 mirrored effects of performance decrease across models.

48 **Conclusions:** Combining the metrics covering all four aspects of discrimination, calibration,  
49 clinical usefulness and overall accuracy into a single consensus metric improved the  
50 efficiency of cognitive decision-making. All models show a decrease in at least 3 of the 5  
51 individual metrics. CEM and variable importance drift detection demonstrate the limitation  
52 of logistic regression methods used for cardiac surgery risk prediction and the effects of  
53 dataset drift. Future work will be required to determine the interplay between ML and  
54 whether ensemble models could take advantage of their respective performance  
55 advantages.

56 **Key words:** cardiac surgery; artificial intelligence; risk prediction; machine learning;  
57 operative mortality; dataset drift; performance drift; national dataset

58

59

60

61

62

63

64

65

66

67

68

69

70

71 **Abbreviations and Acronyms:**

72 AUC area under receiver operating characteristic curve;

73 CEM Clinical Effective Metric;

74 ECE Expected Calibration Error;

75 ES II Euroscore II;

76 AI Artificial intelligence;

77 ML machine learning;

78 RF random forest;

79 NN Neural Network (Neuronetwork);

80 SVM support vector machine;

81 XGBoost extreme gradient boosted trees

82 Ensemble using several models to derive a consensus prediction

83 SHAP (SHapley Additive exPlanations)

84

85

86

87

88

89 **Central message:** ML performance decreases over time due to dataset drift, but remains  
90 superior to ES II. Therefore regular assessment and modification of ML models may be  
91 preferable.

92 **Prospective message:** A gap in understanding the effect of dataset drift on the performance  
93 of ML models over time presents a major barrier to their clinical application. Xgboost and  
94 Random Forest have shown superior performance both temporally and non-temporally  
95 against ES II. However, a decrease in model performance of all models due to dataset drift  
96 suggests the need for regular drift monitoring.

97

98

99

100

101

102

103

104

105

106

107

108

## 109 **Introduction**

110 Recently, the importance of Machine Learning (ML), a branch of Artificial intelligence (AI)  
111 has been highlighted as a potential alternative to conventional mortality risk stratification  
112 models such as Society of Thoracic Surgeons (STS),[1] and EuroSCORE II (ES II) risk scores,[2]  
113 which are prone to miscalibration overtime and poor generalisation across datasets.[1,3] In  
114 particular, the ES II, which is based on logistic regression using 18 items of information  
115 about the patient, has been shown by numerous studies to display poor discrimination and  
116 calibration across datasets with differing characteristics, including but not limited to age,[4]  
117 ethnicity[5] and procedures groups.[6–10]

118 Risk scoring models' performance are challenged by numerous factors, such as  
119 differences in variable definitions, management of incomplete data fields, surgical procedure  
120 selection criteria, and temporal changes in the prevalence of patients' risk factors.[11] ML  
121 approaches are increasingly used for prediction in health care research as they have the  
122 potential to overcome limitations of linear models. By including pairwise and higher-order  
123 interactions and modelling nonlinear effects ML may overcome heterogeneity in procedures  
124 and missing data.[1,12] Whilst ML has been shown to be beneficial over conventional  
125 scoring systems, the magnitude and clinical influence of such improvements remain  
126 uncertain.[2] The ability to counter “performance drift” due to temporal changes in the  
127 prevalence of risk factors has also yet to be fully elucidated.

128 We envisaged that different Machine learning models may perform better for  
129 different metrics and that providing a panel of metrics would be important for covering the  
130 multifaceted aspects of clinical model performance. The Miller's law observed that the

131 human working memory is limited to holding on to an average of seven items in the short-  
132 term memory.[13] This is particularly relevant in a scenario where a clinician would need to  
133 select from a number of ML models based on a panel of performance metrics. The split-  
134 attention effect cognition theory indicates that a single integrated source of information  
135 enhances knowledge acquisition better than separated sources of information.[14]  
136 Therefore, we a consensus approach to metric evaluation by combining the five  
137 performance metrics for risk stratification.

138 We therefore, trained and evaluated 5 supervised ML models to: (1) determine the  
139 best ML model in terms of overall accuracy, discrimination, calibration and clinical  
140 effectiveness, (2) use variable importance drift as a measure for detecting dataset drift and  
141 (3) verify suspected dataset drift by assessing the relationship between and within  
142 performance drift, variable importance drift and dataset drift (e.g. due to changing case-  
143 mix[15]) across ML and ES II approaches.[16]

## 144 **Methods**

### 145 **Dataset and Patient Population**

146 The study was performed using the National Adult Cardiac Surgery Audit (NACSA) dataset,  
147 which comprises data prospectively collected by National Institute for Cardiovascular  
148 Outcome Research on all cardiac procedures performed in all NHS hospitals and some  
149 private hospitals across the UK.[17]

150 Patients undergoing cardiac surgery between 1 Jan 2012 and 31 Mar 2019 were  
151 included. Missing and erroneously inputted data in the dataset were cleaned according to  
152 the National Adult Cardiac Surgery Audit Registry Data Pre-processing recommendations.[18]  
153 Generally, for any variable data that were missing, it was assumed that the variable was at

154 baseline level, i.e., no risk factor was present. Missing patient age at the time of surgery was  
155 imputed as the median patient age for the corresponding year. Data standardization was  
156 performed by subtracting the variable mean and dividing by the standard deviation  
157 values.[19]

158 The dataset was split into two cohorts: Training/Validation (n = 157196; 2012-2016;  
159 Table S1) and Holdout (n = 69891; 2017-2019; Table S2). The primary outcome of this study  
160 was in-hospital mortality.

161 The study was part of a research project approved by the Health Research Authority  
162 (HRA) and Health and Care Research Wales. As the study included retrospective  
163 interrogation of the NICOR database, the need for individual patient consent was waived  
164 (HCRW) (IRAS ID: 278171) in accordance with the research guidance. The study was  
165 performed in accordance with the ethical standards as laid down in the 1964 Declaration of  
166 Helsinki and its later amendments.

167

## 168 **Baseline Statistical analysis**

169 Continuous variables are compared using non-parametric Wilcoxon rank-sum tests, whilst  
170 categorical variables are compared using Pearson's  $\chi^2$  tests or Fisher's exact tests as  
171 appropriate.

172 Scikit-learn v0.23.1 and Keras v2.4.0 were used to develop the models and to evaluate their  
173 discrimination, calibration and clinical effectiveness capabilities. Statistical analyses are  
174 conducted using STATA-MP version 17 and R v4.0.2.[20] Anova Assumptions were checked  
175 using R rstatix package.



## 176 **Model Development**

177 In our study, we trained five supervised ML risk models based on the ES II preoperative  
178 variable set (Table S3). Those five models included Logistic Regression, Neural Network  
179 (Neuronetwork / NN), [19] Random Forest (RF), [21] Weighted Support Vector Machine  
180 (SVM), [22] and Xgboost [23]. [17] ES II score was calculated for baseline comparison. Internal  
181 validation was performed using fivefold cross-validation on the Training/Validation dataset  
182 (2012-2016). External validation was performed on the Holdout dataset (2017-2019). [16]  
183 Each model calculated the probability of surgical mortality for each patient. One thousand  
184 bootstrap samples were taken for all metrics. Further details on model development can be  
185 found in Supplementary Materials, section: Model Specification.

186

## 187 **Assessment of model performance**

188 The Area Under the Curve (AUC) performances of all variant models were evaluated, and  
189 the ROC curves plotted. [24] As a sensitivity analysis, we excluded the True Negative Rate  
190 from the performance evaluation, by calculating the  $F_1$  score. [25] This metric adjusts for the  
191 biased effect due to high proportion of alive outcome samples. Decision Curve net benefit  
192 index is used to test clinical benefit. [26] 1 - Expected Calibration Error (ECE) was used to  
193 determine calibration performance, with higher values being better. [27] The adjusted Brier  
194 score ( $1 - \text{Brier}$ ) was used without the normalization term, [28] but with higher values  
195 indicating better discrimination and calibration performance.

196 To determine the best model in terms of both discrimination and calibration, we  
197 took the geometric average of AUC,  $F_1$ , [25] Decision Curve net benefit (Treated +

198 Untreated),  $1 - \text{ECE}$  and  $1 - \text{Brier}$ . Geometric average has previously been found to be  
 199 effective for summarising metrics for temporal based model calibration[29]. This metric is  
 200 robust to outliers,[30] and is preferable for aggregation compared to the weighted  
 201 geometric mean.[31] The arithmetic average was used for Decision Curve net benefit over  
 202 all thresholds as a measure of overall net benefit, before geometric averaging, since values  
 203 can be negative. We proposed a new metric using the combined geometric average results  
 204 of all metrics, named Clinical Effective Metric (CEM). An overview of the model and  
 205 evaluation design is shown in Figure 1.

206 **Figure 1.** Design overview of the study; non-temporal performance and drift (temporal) analyses are  
 207 performed; drift in discrimination, calibration, clinical utility, dataset and variable importance are  
 208 assessed; time point assessments are performed for CEM; drifts in component metrics of CEM are  
 209 evaluated.

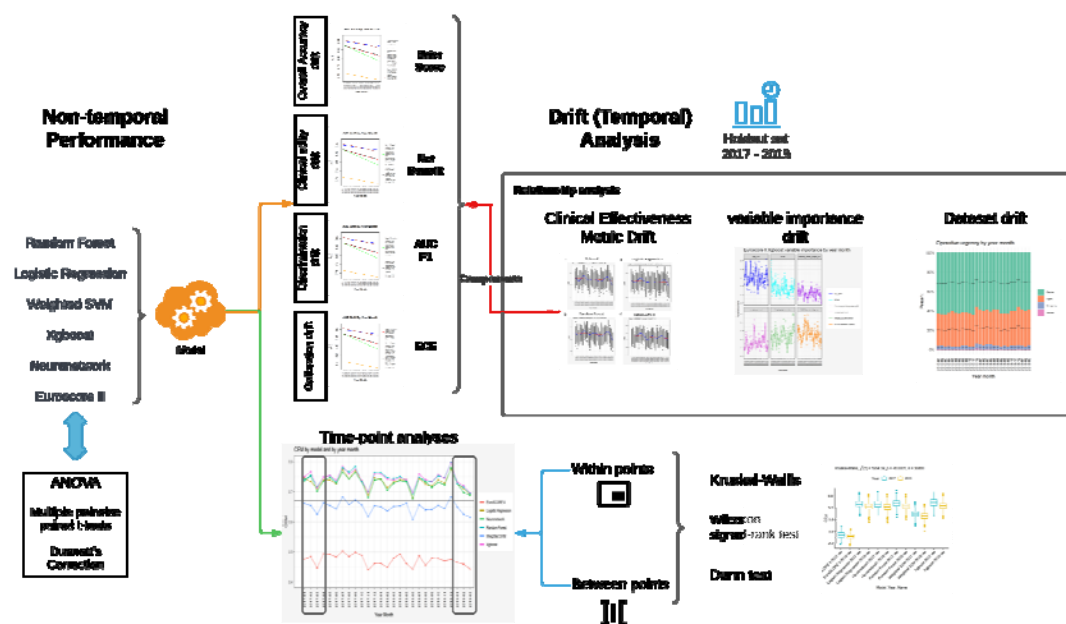

210  
 211

## 212 Baseline non-temporal performance

213 Non-temporal comparison of models was conducted as a baseline, using all data across the  
 214 Holdout period. Differences across models were tested using repeated measures One-Way

215 Anova and Bonferroni Corrected multiple pairwise paired t-tests; this was followed by  
216 Dunnett's Correction for multiple comparisons, with the best overall performing model as  
217 control. ANOVA assumptions for outliers were checked. Normality assumptions were  
218 checked using the Shapiro-Wilk test.[32]

219

## 220 **Drift Analysis**

### 221 CEM Regression trends

222 Geometric CEM mean of 1000 bootstraps for each model against month of the year was  
223 calculated as well as 95% CI and the results were plotted to compare trends across models.  
224 The models were compared by fitting multiple linear regression lines across year months for  
225 CEM.

226 To check for normality assumptions, we plotted the histogram and a QQ plot of  
227 residuals before applying linear regression.[33] We also checked for homogeneity of  
228 residual variance (homoscedasticity) by plotting a scale-location plot i.e. the square root of  
229 standardised residual points against values of the fitted outcome variable.[34] For model  
230 metrics that do not satisfy these assumptions, the Seasonal Kendall Test (non-parametric)  
231 was used instead.

### 232 Analysis within first 3 months of 2017 and 2019

233 Differences in CEM across models at two time-points were independently tested using  
234 Kruskal-Wallis Test and Bonferroni Corrected paired samples Wilcoxon test (Wilcoxon  
235 signed-rank test). The two time-points were the first three months of 2017 and 2019,  
236 respectively. This was followed by the Dunn test for non-parametric multiple comparisons of

237 models at each of the two-time points, with the best overall performing model as a baseline.

238 ANOVA assumptions for outliers were checked. Normality assumptions were checked using

239 the Shapiro-Wilk test.[32]

#### 240 Analysis between first 3 months of 2017 and 2019

241 Differences in models' CEM across the first three months of 2017 and 2019 were tested

242 using Kruskal-Wallis Test and paired samples Wilcoxon test (Wilcoxon signed-rank test).

243 Dunn test was used to determine the magnitude and evidence of change across the two-

244 time points for each model. ANOVA assumptions for outliers were checked. Normality

245 assumptions were checked using Kolmogorov-Smirnov Test.

#### 246 Analysis of discrimination, calibration, clinical utility and overall accuracy drift

247 As a sensitivity analysis, we analysed performance drift in terms of component metrics

248 within CEM. Discrimination (AUC), positive outcome discrimination (F1 score), calibration (1

249 -ECE), clinical utility (net benefit), Adjusted Brier score (overall accuracy of prediction

250 probability) were assessed by fitting multiple (model) linear regression lines across year

251 month for each metric, respectively.

252 To check for normality assumptions, we plotted the histogram and a QQ plot of

253 residuals before applying linear regression.[33] We also checked for homogeneity of

254 residual variance (homoscedasticity) by plotting a scale-location plot i.e. the square root of

255 standardised residual points against values of the fitted outcome variable.[34] For model

256 metrics that do not satisfy these assumptions, the Seasonal Kendall Test (non-parametric) is

257 used instead.

#### 258 **Analysis of variable importance drift**

259 Variable importance drift was assessed for the best performing model. For each year month  
260 of the Holdout dataset, 5-fold nested cross-validation was performed to derive importance  
261 of each ES II variable in the model's decision making. The geometric mean of 5-fold  
262 importance at each time point was plotted along with the importance of each of the 5 folds.  
263 The SHAP mean absolute magnitude of importance was used.[35,36] Loess smoothing was  
264 used to simplify the visual representation. Line plots of the top six important variables were  
265 used as sensitivity analysis.

#### 266 **Dataset drift**

267 Dataset drift across year month was visualised using a stacked bar plot for the top three  
268 variables as identified by SHAP variable importance. Continuous variables were binned into  
269 intervals to enable ease of analysis.

270

#### 271 **Results**

##### 272 **Baseline patient characteristics**

273 A total of 227,087 procedures of adults from 42 hospitals were included in this analysis. This  
274 followed the removal of 3,930 congenital cases, 1,586 transplant and mechanical support  
275 device insertion cases and 3,395 procedures missing information on mortality (Table 1).  
276 There were 6,258 deaths during the study period (mortality rate of 2.76%).

277

##### 278 **Baseline non-temporal performance**

279 No extreme outliers were found. The CEM scores were normally distributed for all three  
280 models except Xgboost, as assessed by Shapiro-Wilk's test ( $p > 0.05$ ). A histogram plot of the  
281 Xgboost CEM values did not show substantial deviation from the normal distribution. There  
282 was strong evidence of a difference across all models  $p < 0.0001$  (Table S4 and Figure S1).  
283 Table 2 shows that Xgboost (CEM 0.728 95CI (95% confidence interval): 0.728-0.729) and RF  
284 (CEM 0.727 95CI 0.727-0.728) are the best overall performing models, with moderate to  
285 strong evidence (non-overlapping CI) of the former outperforming the latter. This was  
286 followed by LR, NN, SVM then ES II. Dunnett's test showed that there was moderate to  
287 strong evidence that Xgboost was superior to all other models ( $p < 0.001$ ) (Table 3). Xgboost  
288 performance was least different from RF, but most different from ES II (CEM difference  
289 0.0009 vs. 0.1876).

290 Sensitivity analysis of CEM component metrics shows that the adjusted Brier score  
291 was unable to distinguish Xgboost, RF, NN and LR (Table 2, all 0.976). AUC performance was  
292 best for Xgboost (0.834) and RF (0.835). F1 score showed that Xgboost performed best  
293 followed by RF (0.279 vs. 0.277). LR and NN (adjusted ECE: both 0.997) showed better  
294 calibration performance than RF and Xgboost (adjusted ECE: both 0.996). Net Benefit overall  
295 was best for Xgboost and RF (both 0.904).

## 296 **Drift Analysis**

### 297 Overall CEM

298 **Figure 2.** a) Plot of CEM by model and by year month; geometric mean of 1000 bootstraps at each time  
299 point is shown as is 95% CI; horizontal line represents the CEM geometric mean of all models; b) Box plot  
300 of difference in models' CEM across first three months of 2017 and 2019; Kruskal-Wallis results for CEM  
301 across the time points are shown; c) Paired samples Wilcoxon test (Wilcoxon signed-rank test) for first 3  
302 months of 2019 bootstrap CEM values; p-values are adjusted using the bonferroni method.

303

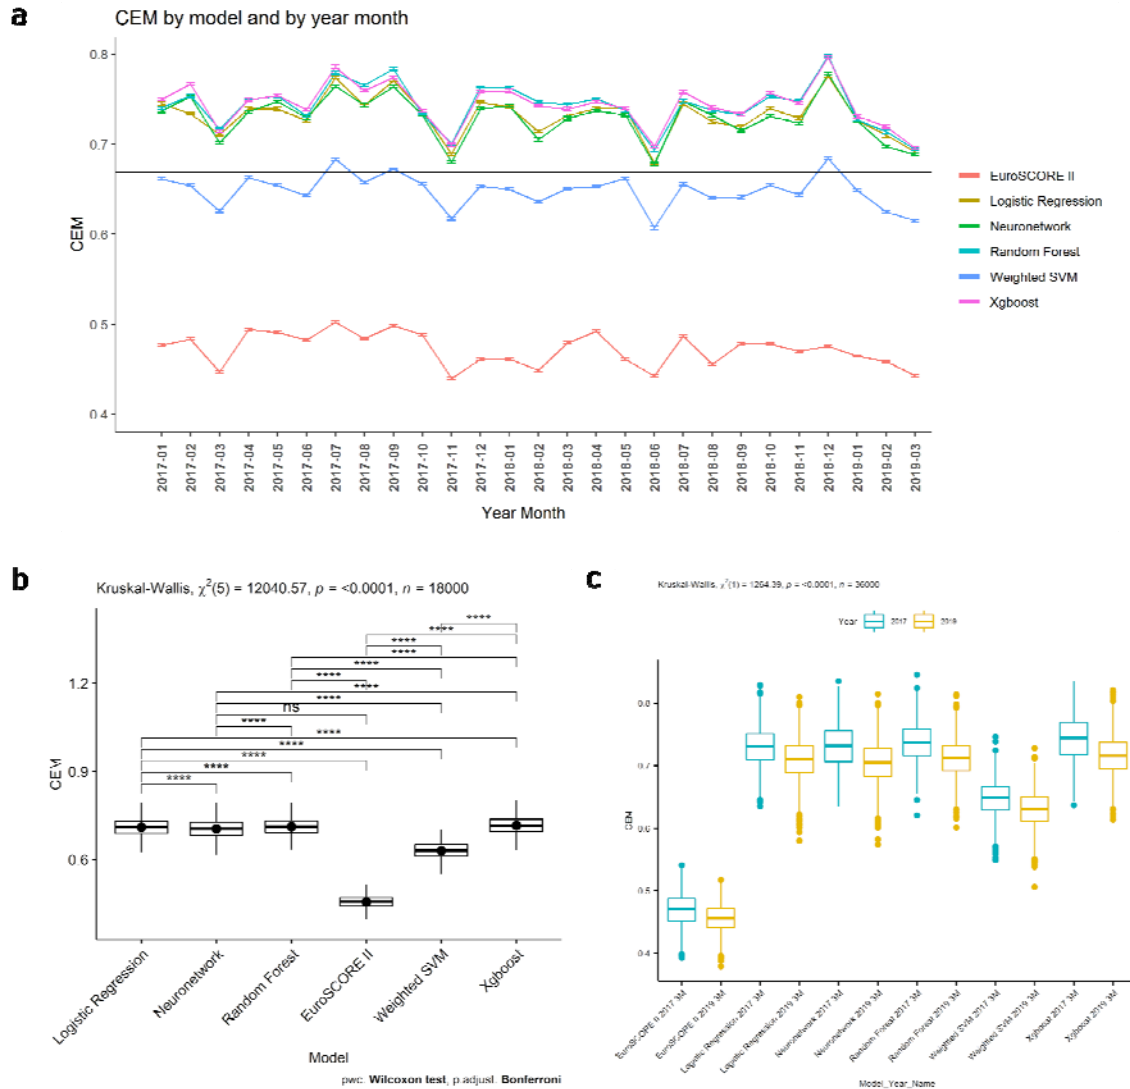

304

305

306 Figure 2a shows that Xgboost and RF were candidates for the best overall CEM performance  
 307 across year month. There was minor evidence of LR outperforming NN across time. Seasonal  
 308 fluctuations were observed. ES II performed worst across time followed by SVM.

309 There was strong evidence of a decrease in overall performance across all models ( $p$   
 310  $< 0.0001$ ). Linear regression plots showed that Xgboost had the best starting CEM (intercept  
 311  $= 0.755$  vs.  $0.753$  (RF),  $0.742$  (LR),  $0.741$  (NN) ), but rate of performance decrease (slope: -

312 0.000720) was less than NN (slope: -0.00083) and greater than RF (-0.000685) and LR (-  
 313 0.000696; Figure 3a-c and Figure S2.1).

314 **Figure 3.** Plot of CEM by model (a. Xgboost; b. Random Forest; c. Logistic Regression; d. EuroSCORE II) and  
 315 by year month; geometric mean of 1000 bootstraps at each time point is shown; red dotted line shows  
 316 linear regression; blue line shows Generalised Additive Model fit (GAM); parameters and p-value for  
 317 linear regression are shown; e) Discrimination (AUC) performance drift by year month; linear regression  
 318 lines are plotted for each model with slope, intercept and p-values displayed in legend;  
 319 (adjusted ECE) performance drift by year month; linear regression lines are plotted for each model with  
 320 slope, intercept and p-values displayed in legend; SVM and ES II are removed to enable clearer separation  
 321 of models with similar performance.

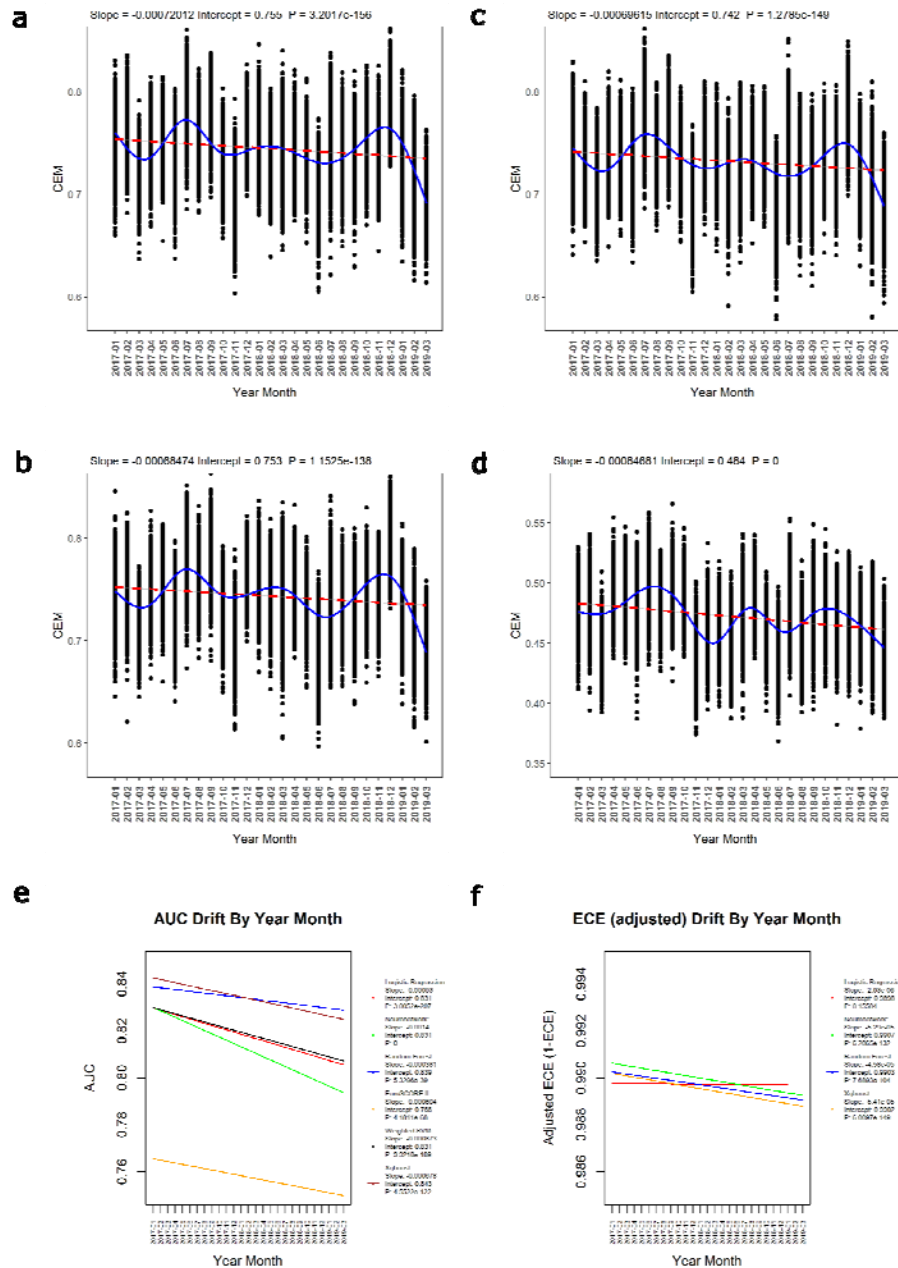



323

324

325 By March 2019, the overall CEM performance ranking was not changed, with Xgboost  
326 performing best, followed by RF, LR and then NN. ES II (intercept: 0.484, slope:- 0.000847)  
327 performed worst in terms of starting CEM and rate of performance decrease, followed by  
328 SVM (intercept:0.658; slope: -0.000625; Figure 3d and S2.2). Normality and homogeneity  
329 assumptions were satisfied for all model CEM values as checked by QQ plot of residuals and  
330 scale-location plot (Supplementary Materials, Figure S2.3).

### 331 Analysis within first 3 months of 2017

332 No extreme outliers were found for models' CEM values in the first three month of 2017.  
333 The CEM scores were non-normally distributed for all models( $p < 0.05$ ). There was strong  
334 evidence of a difference across all models ( $p < 0.0001$ ; Table 2b and Figure S3). Dunn test  
335 showed strong evidence of Xgboost having the best overall performance (Table S6,  $p <$   
336  $0.0001$ ), followed by RF, NN and then LR (CEM difference to Xgboost: -0.0076, -0.0124 and -  
337 0.0138,  $p < 0.0001$ ). EuroSCORE II performed worst followed by Weighted SVM (CEM  
338 difference to Xgboost: -0.2739, -0.0961,  $p < 0.0001$ ).

### 339 Analysis within the first 3 months of 2019

340 No extreme outliers were found for models' CEM values in the first three month of 2019.  
341 The CEM scores were non-normally distributed for 50% of models( $p < 0.05$ ). There was  
342 strong evidence of a difference across all models ( $p < 0.0001$ ; Table S7 and Figure 2b). Dunn  
343 test showed strong evidence of Xgboost having the best overall performance (Table S8,  $p <$   
344  $0.05$ ), followed by RF, LR and then NN (CEM difference to Xgboost: -0.0032, -0.0055 and -

345 0.0108,  $p < 0.05$ ). EuroSCORE II performed worst followed by Weighted SVM (CEM  
346 difference to Xgboost: -0.2594, -0.0856,  $p < 0.0001$ ).

#### 347 Analysis between first 3 months of 2017 and 2019

348 No extreme outliers were found for models' CEM values in the first three months of 2017  
349 and 2019. The CEM scores were non-normally distributed for the first 3 months of 2017 and  
350 2019, as assessed by Kolmogorov-Smirnov Test ( $p < 0.05$ ). There was strong evidence of an  
351 overall difference across the two-time points ( $p < 0.0001$ ; Table S9 and Figure S4). There was  
352 strong evidence of a difference across the two-time points for each individual model ( $p <$   
353  $0.05$ ; Figure 2c and Table S10). Xgboost retained the best overall performance across the  
354 time points examined. This model showed the largest decrease in CEM performance  
355 (Median difference: 0.0288,  $p < 0.0001$ ), followed by NN, RF and then LR (Median difference:  
356 0.0272, 0.0244, 0.0205,  $p < 0.0001$ ). Following a performance decrease from 2017 to 2019,  
357 Xgboost still had the best overall performance with RF being second best (Median CEM  
358 0.716, 0.713) Although NN had better starting performance than LR, the larger performance  
359 drift resulted in NN having a lower overall performance than LR at 2019 (0.705 vs. 0.710).  
360 However, although performance drift was smaller, LR's CEM performance never exceeded  
361 RF (0.710 vs. 0.713). EuroSCORE II showed the least performance drift followed by Weighted  
362 SVM (Median difference: 0.0142, 0.0183,  $p < 0.05$ ), but both performed worst in terms of  
363 absolute CEM.

#### 364 Analysis of discrimination, calibration and clinical effectiveness drift

##### 365 Discrimination

##### 366 **AUC**

367 Linear regression plots show that Xgboost has the best starting AUC (intercept = 0.843 vs.  
368 0.839 (RF), 0.831 (LR, NN, SVM)), but rate of performance decrease was greater than RF and  
369 ES II (slope: -0.000678 vs. -0.000381, -0.000604; Figure 3e). By March 2019, Xgboost AUC  
370 had decreased below RF, resulting in RF being the best performing model, followed by  
371 Xgboost, SVM, LR and then NN. NN showed the largest rate of AUC decrease followed by LR  
372 and SVM (slope: -0.0014, -0.00093, -0.000873). ES II performed worst in terms of AUC across  
373 all time points (intercept: 0.766). There was a strong evidence of decrease in AUC  
374 performance across all models ( $p < 0.0001$ ). Normality and homogeneity assumptions were  
375 satisfied for all model AUC values as checked by QQ plot of residuals and scale-location plot  
376 (Figure S5).

### 377 **F1 score**

378 The best performing model across all Holdout time periods was Xgboost, followed by RF, LR,  
379 NN, SVM and then ES II. There was strong evidence of a decrease in F1 performance across  
380 all models ( $p < 0.0001$ ). For more details, see Supplementary Materials, section: Positive  
381 outcome discrimination.

### 382 Calibration

383 Linear regression plots showed that NN has the best starting adjusted ECE (intercept =  
384 0.9907 vs. 0.9903 (RF), 0.9902 (Xgboost), 0.9898 (LR) ) but rate of performance decrease  
385 was greater than LR and RF (slope:  $-5.29e-5$  vs.  $-2.93e-6$ ,  $-4.58e-5$ ; Figure 3f). By March 2019,  
386 NN adjusted ECE had decreased below LR, resulting in LR being the best performing model,  
387 followed by NN, RF and then Xgboost. While SVM and ES II had lower rates of adjusted ECE  
388 decrease (slope: -0.000251, -0.000479), the calibration performance was much lower at all  
389 time points compared to the other models (Figure S6). There was strong evidence of

390 decrease in adjusted ECE performance across all models ( $p < 0.0001$ ), except LR ( $p > 0.05$ ).

391 Normality and homogeneity assumptions were satisfied for all model adjusted ECE values as

392 checked by QQ plot of residuals and scale-location plot (Figure S7).

### 393 Clinical Effectiveness

394 Linear regression plots showed that Xgboost has the best starting net benefit (intercept =

395 0.9051 vs. 0.9043 (RF), 0.9035 (NN, LR)) but rate of performance decrease was greater than

396 RF (slope:  $-5.68e-5$  vs.  $-2.5e-6$ ; Figure 4a), but slower than LR ( $-9.38e-5$ ) and even slower

397 than NN ( $-0.000145$ ).

398 **Figure 4** a) Clinical effectiveness (net benefit) performance drift by year month; linear regression  
399 lines are plotted for each model with slope, intercept and p-values displayed in legend; SVM and  
400 ES II are removed to enable clearer separation of models with similar performance; b) SHAP  
401 variable importance drift for 27 month of Holdout set; solid dots show geometric mean values of  
402 5 fold cross validation; smoothed loess lines are plotted, with green bands showing 95%  
403 confidence intervals; c) SHAP variable importance drift for 27 month of Holdout set for top six  
404 most important variables; trends are unsmoothed; d) Operative urgency dataset drift across year  
405 month for Holdout set; percentages of each category are shown for each time point.

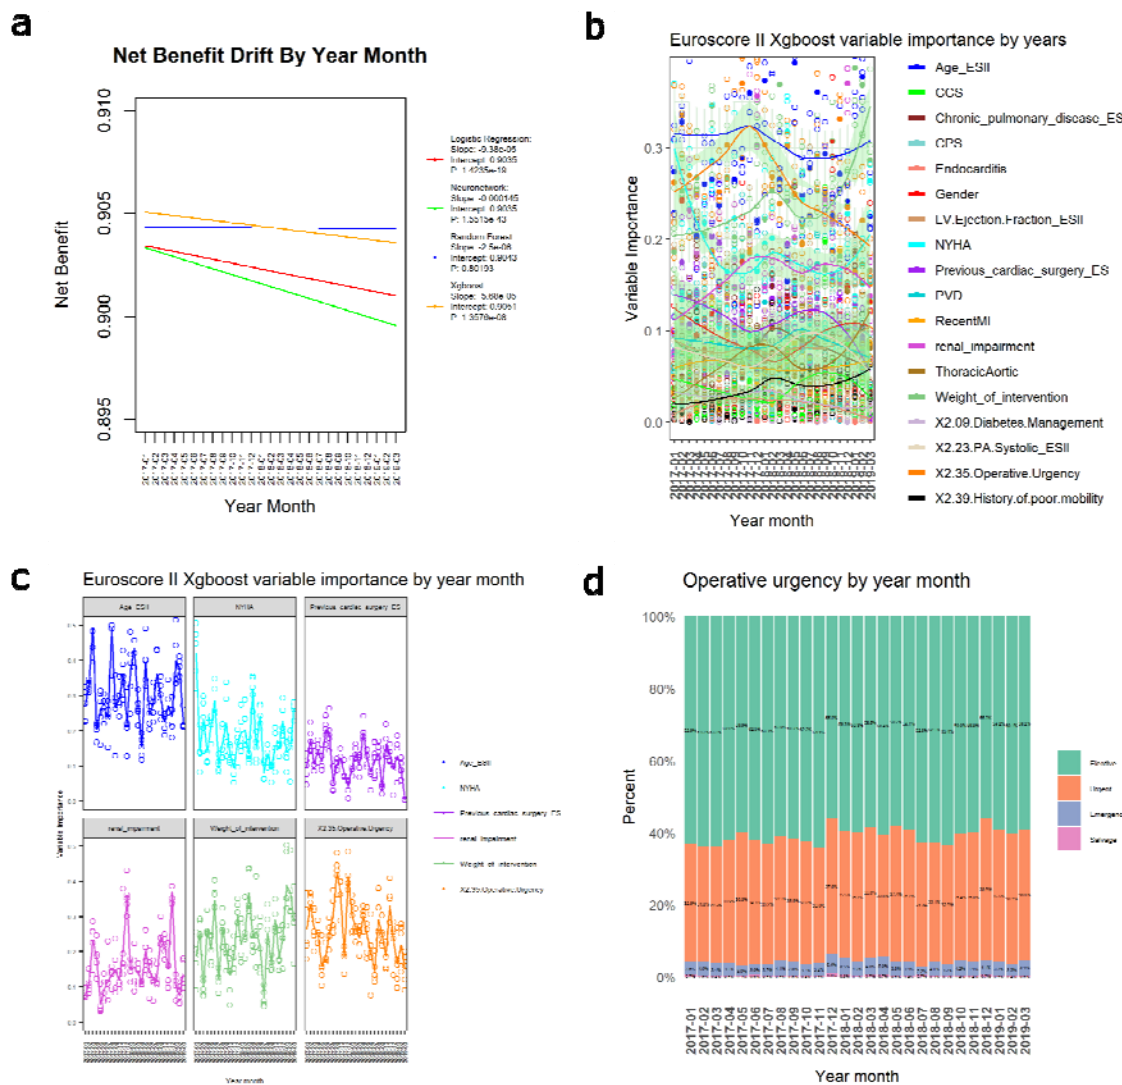

406

407

408 By March 2019, Xgboost net benefit had decreased below RF, resulting in RF being the best

409 performing model, followed by Xgboost, LR and NN. ES II showed the largest rate of net

410 benefit decrease and performed worst across all time points followed by SVM (intercept:

411 0.314, 0.690; slope: -0.000846, -0.000364; Figure S8). There was strong evidence of a

412 decrease in net benefit performance across all models ( $p < 0.0001$ ), except RF ( $p > 0.05$ ).

413 Normality and homogeneity assumptions were satisfied for all model net benefit values as

414 checked by QQ plot of residuals and scale-location plot (Figure S9).

415 Accuracy of prediction probability

416 By March 2019, Xgboost was the best model followed by RF, LR and then NN. ES II  
417 performed worst in terms of Adjusted Brier and rate of decrease, followed by SVM. There  
418 was strong evidence of a decrease in Adjusted Brier performance across all models ( $p <$   
419  $0.0001$ ), except Xgboost and RF. For more details, see Supplementary Materials, section:  
420 Accuracy of prediction probability.

421 Analysis of variable importance drift

422 SHAP mean absolute magnitude of importance was used to measure variable importance  
423 drift for the best temporal and non-temporal model (Xgboost). Smoothed trend lines  
424 showed substantial drift in numerous variables, including the most important variables: age,  
425 operative urgency, the weight of intervention, NYHA, renal impairment and previous cardiac  
426 surgery (Figure 4b). Sensitivity analysis showed a substantial drift in variable importance  
427 across the Holdout set for all six variables (Figure 4c). When compared with CEM  
428 performance drop between 2017-10 to 2017-12 and between 2018-06 to 2018-07 (Figure 3  
429 GAM line), it could be seen that the CEM decrease was mirrored by decreases in the  
430 importance of the top variables: age and operative urgency at these time periods (Figure 4c).  
431 A decrease in CEM performance in the three months of 2019 was likely to be at least partly  
432 contributed to by the sudden rise in importance of the weight of intervention (Figure 3 and  
433 Figure 4b, 4c).

434 Dataset drift across time

435 Dataset drift is observed throughout the Holdout time periods for operative urgency with  
436 sharp drifts observed across all categories between 2017-11 (YYYY-MM) to 2017-12 and  
437 between 2018-06 and 2018-07 (Figure 4d). Dataset drift was observed across the Holdout

438 time periods for patient age groups above and below 60 (Figure S15), with marked data  
439 drifts observed between 2017-10 to 2017-11 and between 2018-07 to 2018-08. Dataset drift  
440 was observed across the Holdout time periods for Weight of intervention (Figure S16). Sharp  
441 dataset drifts were observed for the Single non-CABG and 3 procedures category between  
442 2018-12 to 2019-02.

443

#### 444 **DISCUSSION**

445 The main finding of the study was that Xgboost performed best followed by RF, LR and then  
446 NN when all metrics are simultaneously considered, both temporally and non-temporally.  
447 Furthermore, EuroSCORE II substantially underperformed against all ML models across all  
448 comparisons and presents an urgent need to replace this score. By first combining all  
449 metrics and then analysing the temporal drift of each metric individually, we were able to  
450 determine the contribution of individual metrics to the overall performance drift of each  
451 model. We found strong evidence that all models showed a decrease in at least 3 of the 5  
452 individual metrics within CEM. This demonstrated the importance for clinicians and ML  
453 governance teams to actively monitor the effects of dataset drift (as explained later) on “Big  
454 Data” models that are prepared for or being clinically used in order to minimise the risk of  
455 harm to patients.

456 “Big data” refers to large and detailed datasets that are suited to ML analyses rather  
457 than traditional statistical analyses.[37,38] This is increasingly utilised in healthcare. These  
458 analyses can inform, personalise and potentially improve care.[37,39,40] Despite growing  
459 interest[41] in ML and healthcare data linkage initiatives such the Health Informatics  
460 Collaborative (HIC),[42] there have been limited reports of usage within cardiac surgery,[43–

461 45] with one of the main reasons being a lack of understanding by clinicians of the  
462 underlining processes.[46]

463 As more countries follow in the steps of the U.S. to deploy ML to the medical  
464 settings,[47] it becomes increasingly critical that clinicians and ML governance teams are  
465 adequately prepared for situations in which ML systems fail to perform their intended  
466 functions.[48] A major factor in ML malfunction is “Dataset Drift”, where ML performance  
467 declines due to a mismatch between the data on which the model was trained and the new  
468 unseen data to which the model is applied.[49] Several factors have been reported to  
469 influence dataset drift, including changes in technology, demographics, and patient or  
470 clinician behaviour.[48]

471 In our previous systematic review, we found that despite ML models achieving  
472 better discriminatory ability than traditional LR approaches, few cardiac surgery studies  
473 assessed calibration, clinical utility, discrimination and dataset drift collectively; these  
474 aspects should be assessed to determine the clinical implications of ML.[2] While calibration  
475 drift over time is well documented amongst EuroSCORE and logistic regression models for  
476 hospital mortality, the susceptibility of competing ML modelling methods to dataset drift  
477 has not been well studied in cardiac surgery.[50]

478 This study heeds to the call for additional metrics to address the lack of sensitivity of  
479 the most commonly used C-statistic and calibration slope in capturing the advantage of ML  
480 models,[51] by demonstrating the use of a consensus score[19,52–55] named CEM to take  
481 into account numerous metrics that have been found to be beneficial, covering overall  
482 accuracy,[51] discrimination, calibration and clinical utility. This study showed invariance in



483 model ranking for the CEM in both temporal and non-temporal analyses, indicating there is  
484 value for this consensus scoring approach in performance drift evaluation.

485 The current study also addresses the gap in understanding the effect of dataset drift  
486 on the performance of ML and traditional models over time, which presents a barrier to  
487 their clinical application. The shift in best performing AUC and net benefit model between  
488 Xgboost and RF, and between NN and LR for “adjusted ECE” demonstrates that comparison  
489 of models at a single time point was insufficient to understand the clinical limitations of ML  
490 models and at least two-time points should be considered.

491 Our study has also found that although RF shows comparable discrimination (AUC)  
492 and clinical utility (net benefit) performance across time, the reason for Xgboost’s superior  
493 overall temporal performance was in its better overall accuracy (Adjusted Brier) and positive  
494 outcome discrimination (F1). F1 score is often overlooked, but is especially important in  
495 cardiac surgery datasets, whereby the incidence for the outcome of interest is typically very  
496 low and introduces bias in the performance evaluation, when AUC is used. We found that RF  
497 performed second best overall. Unlike Xgboost, RF performed better in terms of resistance  
498 to drift in AUC and net benefit, suggesting that further work is required to determine  
499 whether the synergistic (ensemble) effects across models are beneficial for improving  
500 cardiac surgery risk prediction. Although Xgboost is currently the best temporal and non-  
501 temporal model for the National Adult Cardiac Surgery Audit dataset, periodic monitoring of  
502 performance drift for each yearly revision of this dataset should be mandated to determine  
503 whether or not performance is overtaken by RF, and if so, at what point in time this  
504 happens.[48] As all models showed strong evidence of decrease in overall performance

505 from 2017-01 to 2019-03, further work will be required to develop either better performing  
506 models or models that are less susceptible to performance drift.

507 We have demonstrated that by associating relationships between smoothed[56] and  
508 unsmoothed trend lines for CEM performance and ES II variable importance, that it was  
509 possible to detect subtle dataset drifts that could result in model performance drifts. Our  
510 findings of variable importance and dataset drift between 2017-10 to 2017-12, between  
511 2018-06 to 2018-07 and between 2018-12 to 2019-02 are likely to reflect seasonality  
512 changes and mirrored effects of sharp drifts in CEM performance across models. The  
513 detection of dataset drift was verified by checking for actual drifts in the dataset variables. A  
514 non-cardiac surgery study has used actual dataset drift to check for variable importance  
515 detected dataset drift.[50] However, drift in the actual dataset was only analysed across two  
516 data points,[50] without consideration for smoothed and unsmoothed relationships across  
517 performance, variable importance and actual variable incidence. The current study provides  
518 the foundations for which further work analysing ML performance drift are recommended  
519 to analyse relationships between drifts in a consensus score such as CEM and in variable  
520 importance, followed by confirmation of any detected drifts using actual dataset trends.

521

## 522 **Limitations**

523 Although statistical rigour has been applied to determine whether performance drift is a  
524 barrier to clinical risk modelling and decision-making, further work could be done to apply  
525 more statistically sensitive approaches to comparing the interactions of trends in dataset  
526 drift, performance drift and variable importance drift. While CEM is a consensus score that  
527 enhances clinical evaluation of complex relationships across different aspects of model

528 performance, compressing the net benefit measure into a single value would mean that  
529 further decision curve analysis may be required if individual-specific threshold-based  
530 decisions were to be fully considered.

531

## 532 **CONCLUSION**

533 This study addresses the gap in understanding the effect of dataset drift on the performance  
534 of ML and traditional models over time, which presents a barrier to the clinical application  
535 of ML. This was demonstrated by highlighting the importance of using a temporal and non-  
536 temporal ranking invariant consensus-based score for evaluating various ML approaches  
537 against traditional models, using smoothed and unsmoothed trend analysis, while  
538 comparatively assessing for relationships between and within variable importance drift,  
539 performance drift and actual dataset drift, for selecting the clinical ML model that minimizes  
540 the risk of patient harm. The strong evidence of all models showing a decrease in at least 3  
541 of the 5 individual metrics within CEM demonstrates the importance of clinicians and ML  
542 governance teams actively monitoring the effects of dataset drift on models that are  
543 prepared for or being used for cardiac surgery risk prediction. Our data suggest that  
544 EuroSCORE II should be replaced with better performing ML models such as Xgboost and RF,  
545 which have demonstrated less drift over time. Future work will be required to determine  
546 the interplay between Xgboost and RF and whether ensemble models could take advantage  
547 of their respective performance advantages.

548 **Acknowledgement:** This work was supported by a grant from the BHF-Turing Institute and  
549 the *NIHR Biomedical Research Centre at University Hospitals Bristol and Weston NHS Foundation*  
550 *Trust and the University of Bristol.*

551 **Data availability**

552 All data used in this study are from the National Adult Cardiac Surgery Audit (NACSA) dataset. These  
553 data may be requested from Healthcare Quality Improvement Partnership (HQIP),  
554 <https://www.hqip.org.uk/national-programmes/accessing-ncapop-data/#.Ys6gN-zMLdp>.

555

556

557

558

559

560

561

562

563

564

565

566 **References**

567 1 Ong CS, Reinertsen E, Sun H, *et al*. Prediction of operative mortality for patients undergoing  
568 cardiac surgical procedures without established risk scores. *The Journal of Thoracic and*  
569 *Cardiovascular Surgery* Published Online First: 14 September 2021.  
570 doi:10.1016/j.jtcvs.2021.09.010

571 2 Benedetto U, Dimagli A, Sinha S, *et al*. Machine learning improves mortality risk prediction after  
572 cardiac surgery: Systematic review and meta-analysis. *The Journal of Thoracic and Cardiovascular*  
573 *Surgery* Published Online First: 10 August 2020. doi:10.1016/j.jtcvs.2020.07.105

- 574 3 Kieser TM, Rose MS, Head SJ. Comparison of logistic EuroSCORE and EuroSCORE II in predicting  
575 operative mortality of 1125 total arterial operations †. *European Journal of Cardio-Thoracic*  
576 *Surgery* 2016;**50**:509–18. doi:10.1093/ejcts/ezw072
- 577 4 Poullis M, Pullan M, Chalmers J, *et al.* The validity of the original EuroSCORE and EuroSCORE II in  
578 patients over the age of seventy. *Interactive CardioVascular and Thoracic Surgery* 2015;**20**:172–7.  
579 doi:10.1093/icvts/ivu345
- 580 5 Zhang G, Wang C, Wang L, *et al.* Validation of EuroSCORE II in Chinese Patients Undergoing Heart  
581 Valve Surgery. *Heart, Lung and Circulation* 2013;**22**:606–11. doi:10.1016/j.hlc.2012.12.012
- 582 6 Silaschi M, Conradi L, Seiffert M, *et al.* Predicting Risk in Transcatheter Aortic Valve Implantation:  
583 Comparative Analysis of EuroSCORE II and Established Risk Stratification Tools. *Thorac Cardiovasc*  
584 *Surg* 2015;**63**:472–8. doi:10.1055/s-0034-1389107
- 585 7 Carnero-Alcázar M, Silva Guisasola JA, Reguillo Lacruz FJ, *et al.* Validation of EuroSCORE II on a  
586 single-centre 3800 patient cohort. *Interactive CardioVascular and Thoracic Surgery* 2013;**16**:293–  
587 300. doi:10.1093/icvts/ivs480
- 588 8 Arangalage D, Cimadevilla C, Alkholder S, *et al.* Agreement between the new EuroSCORE II, the  
589 Logistic EuroSCORE and the Society of Thoracic Surgeons score: Implications for transcatheter  
590 aortic valve implantation. *Archives of Cardiovascular Diseases* 2014;**107**:353–60.  
591 doi:10.1016/j.acvd.2014.05.002
- 592 9 Atashi A, Amini S, Tashnizi MA, *et al.* External Validation of European System for Cardiac  
593 Operative Risk Evaluation II (EuroSCORE II) for Risk Prioritization in an Iranian Population. *Braz J*  
594 *Cardiovasc Surg* 2018;**33**:40–6. doi:10.21470/1678-9741-2017-0030
- 595 10 Provenchère S, Chevalier A, Ghodbane W, *et al.* Is the EuroSCORE II reliable to estimate  
596 operative mortality among octogenarians? *PLOS ONE* 2017;**12**:e0187056.  
597 doi:10.1371/journal.pone.0187056
- 598 11 Nilsson J, Ohlsson M, Thulin L, *et al.* Risk factor identification and mortality prediction in  
599 cardiac surgery using artificial neural networks. *The Journal of Thoracic and Cardiovascular*  
600 *Surgery* 2006;**132**:12-19.e1. doi:10.1016/j.jtcvs.2005.12.055
- 601 12 Kurlansky P. Commentary: The risk of risk models. *The Journal of Thoracic and*  
602 *Cardiovascular Surgery* 2020;**160**:181–2. doi:10.1016/j.jtcvs.2019.12.063
- 603 13 Kang X. The Effect of Color on Short-term Memory in Information Visualization. In:  
604 *Proceedings of the 9th International Symposium on Visual Information Communication and*  
605 *Interaction*. Dallas TX USA: : ACM 2016. 144–5. doi:10.1145/2968220.2968237
- 606 14 Ayres P, Cierniak G. Split-Attention Effect. In: Seel NM, ed. *Encyclopedia of the Sciences of*  
607 *Learning*. Boston, MA: : Springer US 2012. 3172–5. doi:10.1007/978-1-4419-1428-6\_19
- 608 15 Benedetto U, Dimagli A, Gibbison B, *et al.* Disparity in clinical outcomes after cardiac surgery  
609 between private and public (NHS) payers in England. *The Lancet Regional Health – Europe* 2021;**1**.  
610 doi:10.1016/j.lanepe.2020.100003
- 611 16 Hickey GL, Blackstone EH. External model validation of binary clinical risk prediction models  
612 in cardiovascular and thoracic surgery. *The Journal of Thoracic and Cardiovascular Surgery*  
613 2016;**152**:351–5. doi:10.1016/j.jtcvs.2016.04.023

- 614 17 Benedetto U, Sinha S, Lyon M, *et al.* Can machine learning improve mortality prediction  
615 following cardiac surgery? *European Journal of Cardio-Thoracic Surgery* 2020;**58**:1130–6.  
616 doi:10.1093/ejcts/ezaa229
- 617 18 Hickey GL, Grant SW, Cosgriff R, *et al.* Clinical registries: governance, management, analysis  
618 and applications. *European Journal of Cardio-Thoracic Surgery* 2013;**44**:605–14.  
619 doi:10.1093/ejcts/ezt018
- 620 19 Dong T, Benedetto U, Sinha S, *et al.* Deep recurrent reinforced learning model to compare  
621 the efficacy of targeted local versus national measures on the spread of COVID-19 in the UK. *BMJ*  
622 *Open* 2022;**12**:e048279. doi:10.1136/bmjopen-2020-048279
- 623 20 StataCorp. Stata Statistical Software: Release 17. College Station, TX: StataCorp LLC; 2021.
- 624 21 Sarica A, Cerasa A, Quattrone A. Random Forest Algorithm for the Classification of  
625 Neuroimaging Data in Alzheimer’s Disease: A Systematic Review. *Front Aging Neurosci* 2017;**9**:329.  
626 doi:10.3389/fnagi.2017.00329
- 627 22 Prabhakararao E, Dandapat S. A Weighted SVM Based Approach for Automatic Detection of  
628 Posterior Myocardial Infarction Using VCG Signals. In: *2019 National Conference on*  
629 *Communications (NCC)*. 2019. 1–6. doi:10.1109/NCC.2019.8732238
- 630 23 Rajliwall NS, Davey R, Chetty G. Cardiovascular Risk Prediction Based on XGBoost. In: *2018*  
631 *5th Asia-Pacific World Congress on Computer Science and Engineering (APWC on CSE)*. 2018. 246–  
632 52. doi:10.1109/APWC on CSE.2018.00047
- 633 24 Kumar NK, Sindhu GS, Prashanthi DK, *et al.* Analysis and Prediction of Cardio Vascular  
634 Disease using Machine Learning Classifiers. In: *2020 6th International Conference on Advanced*  
635 *Computing and Communication Systems (ICACCS)*. 2020. 15–21.  
636 doi:10.1109/ICACCS48705.2020.9074183
- 637 25 Tiwari P, Colborn KL, Smith DE, *et al.* Assessment of a Machine Learning Model Applied to  
638 Harmonized Electronic Health Record Data for the Prediction of Incident Atrial Fibrillation. *JAMA*  
639 *Network Open* 2020;**3**:e1919396–e1919396. doi:10.1001/jamanetworkopen.2019.19396
- 640 26 Allyn J, Allou N, Augustin P, *et al.* A Comparison of a Machine Learning Model with  
641 EuroSCORE II in Predicting Mortality after Elective Cardiac Surgery: A Decision Curve Analysis.  
642 *PLOS ONE* 2017;**12**:e0169772. doi:10.1371/journal.pone.0169772
- 643 27 Mehrtash A, Wells WM, Tempny CM, *et al.* Confidence Calibration and Predictive  
644 Uncertainty Estimation for Deep Medical Image Segmentation. *IEEE Transactions on Medical*  
645 *Imaging* 2020;**39**:3868–78. doi:10.1109/TMI.2020.3006437
- 646 28 Steyerberg EW, Vickers AJ, Cook NR, *et al.* Assessing the Performance of Prediction Models:  
647 A Framework for Traditional and Novel Measures. *Epidemiology* 2010;**21**:128–38.  
648 doi:10.1097/EDE.0b013e3181c30fb2
- 649 29 Armstrong JS, Collopy F. Error measures for generalizing about forecasting methods:  
650 Empirical comparisons. *International Journal of Forecasting* 1992;**8**:69–80. doi:10.1016/0169-  
651 2070(92)90008-W

- 652 30 Kacalak W, Lipiński D, Róžański R, *et al.* Assessment of the classification ability of parameters  
653 characterizing surface topography formed in manufacturing and operation processes.  
654 *Measurement* 2021;**170**:108715. doi:10.1016/j.measurement.2020.108715
- 655 31 Krejčí J, Stoklasa J. Aggregation in the analytic hierarchy process: Why weighted geometric  
656 mean should be used instead of weighted arithmetic mean. *Expert Systems with Applications*  
657 2018;**114**:97–106. doi:10.1016/j.eswa.2018.06.060
- 658 32 González-Estrada E, Cosmes W. Shapiro–Wilk test for skew normal distributions based on  
659 data transformations. *Journal of Statistical Computation and Simulation* 2019;**89**:3258–72.  
660 doi:10.1080/00949655.2019.1658763
- 661 33 US EPA O. Guidance for Data Quality Assessment.  
662 2015.<https://www.epa.gov/quality/guidance-data-quality-assessment> (accessed 10 Feb 2022).
- 663 34 McLeod AI. Improved Spread-Location Visualization. *Journal of Computational and Graphical*  
664 *Statistics* 1999;**8**:135–41. doi:10.1080/10618600.1999.10474806
- 665 35 Barda N, Riesel D, Akriv A, *et al.* Developing a COVID-19 mortality risk prediction model  
666 when individual-level data are not available. *Nat Commun* 2020;**11**:4439. doi:10.1038/s41467-  
667 020-18297-9
- 668 36 Lundberg SM, Lee S-I. A Unified Approach to Interpreting Model Predictions. ;:10.
- 669 37 Raghupathi W, Raghupathi V. Big data analytics in healthcare: promise and potential. *Health*  
670 *Inf Sci Syst* 2014;**2**:3. doi:10.1186/2047-2501-2-3
- 671 38 Silverio A, Cavallo P, De Rosa R, *et al.* Big Health Data and Cardiovascular Diseases: A  
672 Challenge for Research, an Opportunity for Clinical Care. *Front Med (Lausanne)* 2019;**6**:36.  
673 doi:10.3389/fmed.2019.00036
- 674 39 Agrawal R, Prabakaran S. Big data in digital healthcare: lessons learnt and recommendations  
675 for general practice. *Heredity* 2020;**124**:525–34. doi:10.1038/s41437-020-0303-2
- 676 40 Pencina MJ, Goldstein BA, D’Agostino RB. Prediction Models — Development, Evaluation,  
677 and Clinical Application. *New England Journal of Medicine* 2020;**382**:1583–6.  
678 doi:10.1056/NEJMp2000589
- 679 41 Ruiz VM, Goldsmith MP, Shi L, *et al.* Early prediction of clinical deterioration using data-  
680 driven machine-learning modeling of electronic health records. *The Journal of Thoracic and*  
681 *Cardiovascular Surgery* 2021;**0**. doi:10.1016/j.jtcvs.2021.10.060
- 682 42 Sinha S, Benedetto U, Mulla A, *et al.* Abstract 14169: Implications of Elevated Troponin on  
683 Time-to-Surgery in Non-ST Elevation Myocardial Infarction (NIHR Health Informatics Collaborative:  
684 Trop-CABG Study). *Circulation* 2021;**144**:A14169–A14169. doi:10.1161/circ.144.suppl\_1.14169
- 685 43 Hernandez-Suarez DF, Kim Y, Villablanca P, *et al.* Machine Learning Prediction Models for In-  
686 Hospital Mortality After Transcatheter Aortic Valve Replacement. *JACC Cardiovasc Interv*  
687 2019;**12**:1328–38. doi:10.1016/j.jcin.2019.06.013
- 688 44 Wojnarski CM, Roselli EE, Idrees JJ, *et al.* Machine-learning phenotypic classification of  
689 bicuspid aortopathy. *The Journal of Thoracic and Cardiovascular Surgery* 2018;**155**:461-469.e4.  
690 doi:10.1016/j.jtcvs.2017.08.123

- 691 45 Chen Z, Li J, Sun Y, *et al.* A novel predictive model for poor in-hospital outcomes in patients  
692 with acute kidney injury after cardiac surgery. *The Journal of Thoracic and Cardiovascular Surgery*  
693 Published Online First: 11 May 2021. doi:10.1016/j.jtcvs.2021.04.085
- 694 46 Domaratzki M, Kidane B. Deus ex machina? Demystifying rather than deifying machine  
695 learning. *The Journal of Thoracic and Cardiovascular Surgery* 2022;**163**:1131-1137.e4.  
696 doi:10.1016/j.jtcvs.2021.02.095
- 697 47 Rajkomar A, Dean J, Kohane I. Machine Learning in Medicine. *New England Journal of*  
698 *Medicine* 2019;**380**:1347–58. doi:10.1056/NEJMra1814259
- 699 48 Finlayson SG, Subbaswamy A, Singh K, *et al.* The Clinician and Dataset Shift in Artificial  
700 Intelligence. *New England Journal of Medicine* 2021;**385**:283–6. doi:10.1056/NEJMc2104626
- 701 49 Subbaswamy A, Saria S. From development to deployment: dataset shift, causality, and shift-  
702 stable models in health AI. *Biostatistics* 2020;**21**:345–52. doi:10.1093/biostatistics/kxz041
- 703 50 Duckworth C, Chmiel FP, Burns DK, *et al.* Using explainable machine learning to characterise  
704 data drift and detect emergent health risks for emergency department admissions during COVID-  
705 19. *Sci Rep* 2021;**11**:23017. doi:10.1038/s41598-021-02481-y
- 706 51 Huang C, Li S-X, Caraballo C, *et al.* Performance Metrics for the Comparative Analysis of  
707 Clinical Risk Prediction Models Employing Machine Learning. [Miscellaneous Article]. *Circulation:*  
708 *Cardiovascular Quality & Outcomes* 2021;**14**. doi:10.1161/CIRCOUTCOMES.120.007526
- 709 52 Ericksen SS, Wu H, Zhang H, *et al.* Machine Learning Consensus Scoring Improves  
710 Performance Across Targets in Structure-Based Virtual Screening. *J Chem Inf Model*  
711 2017;**57**:1579–90. doi:10.1021/acs.jcim.7b00153
- 712 53 Hornik K, Meyer D. Deriving Consensus Rankings from Benchmarking Experiments. In:  
713 Decker R, Lenz H-J, eds. *Advances in Data Analysis*. Berlin, Heidelberg: : Springer 2007. 163–70.  
714 doi:10.1007/978-3-540-70981-7\_19
- 715 54 Hu J, Peng Y, Lin Q, *et al.* An ensemble weighted average conservative multi-fidelity  
716 surrogate modeling method for engineering optimization. *Engineering with Computers* Published  
717 Online First: 9 November 2020. doi:10.1007/s00366-020-01203-8
- 718 55 Devaraj J, Madurai Elavarasan R, Pugazhendhi R, *et al.* Forecasting of COVID-19 cases using  
719 deep learning models: Is it reliable and practically significant? *Results in Physics* 2021;**21**:103817.  
720 doi:10.1016/j.rinp.2021.103817
- 721 56 Fudulu DP, Dimagli A, Sinha S, *et al.* Weekday and outcomes of elective cardiac surgery in  
722 the UK: a large retrospective database analysis. *Eur J Cardiothorac Surg* 2022;;ezac038.  
723 doi:10.1093/ejcts/ezac038

724

725

726 **Figure legends**



727 Figure 1. Design overview of the study; non-temporal performance and drift (temporal)  
728 analyses are performed; drift in discrimination, calibration, clinical utility, dataset and  
729 variable importance are assessed; time point assessments are performed for CEM; drifts in  
730 component metrics of CEM are evaluated.

731 Figure 2. a) Plot of CEM by model and by year month; geometric mean of 1000 bootstraps at  
732 each time point is shown as is 95% CI; horizontal line represents the CEM geometric mean of  
733 all models; b) Box plot of difference in models' CEM across first three months of 2017 and  
734 2019; Kruskal-Wallis results for CEM across the time points are shown; c) Paired samples  
735 Wilcoxon test (Wilcoxon signed-rank test) for first 3 months of 2019 bootstrap CEM values;  
736 p-values are adjusted using the bonferroni method.

737 Figure 3. Plot of CEM by model (a. Xgboost; b. Random Forest; c. Logistic Regression; d.  
738 EuroSCORE II) and by year month; geometric mean of 1000 bootstraps at each time point is  
739 shown; red dotted line shows linear regression; blue line shows Generalised Additive Model  
740 fit (GAM); parameters and p-value for linear regression are shown; e) Discrimination (AUC)  
741 performance drift by year month; linear regression lines are plotted for each model with slope,  
742 intercept and p-values displayed in legend; f) Calibration (adjusted ECE) performance drift  
743 by year month; linear regression lines are plotted for each model with slope, intercept and p-  
744 values displayed in legend; SVM and ES II are removed to enable clearer separation of  
745 models with similar performance.

746 Figure 4 a) Clinical effectiveness (net benefit) performance drift by year month; linear  
747 regression lines are plotted for each model with slope, intercept and p-values displayed in  
748 legend; SVM and ES II are removed to enable clearer separation of models with similar  
749 performance; b) SHAP variable importance drift for 27 month of Holdout set; solid dots show  
750 geometric mean values of 5 fold cross validation; smoothed loess lines are plotted, with green  
751 bands showing 95% confidence intervals; c) SHAP variable importance drift for 27 month of  
752 Holdout set for top six most important variables; trends are unsmoothed; d) Operative  
753 urgency dataset drift across year month for Holdout set; percentages of each category are  
754 shown for each time point.

755

756

757

758

759

760

761

762

763

764

765

766

767

768

769

770

771

772

773

774

775

776

777

778 **Table 1. Patient Demographics**

779 **Table 1.** Summary of cleaned Euroscore II Variables. Variables are for the time period 2012 – 2019.

780 Records with missing mortality status were excluded.

| Variable                      | Mortality Status            |                           | p-value <sup>2</sup> |
|-------------------------------|-----------------------------|---------------------------|----------------------|
|                               | 0, N = 220,829 <sup>1</sup> | 1, N = 6,258 <sup>1</sup> |                      |
| <b>Age (years), mean (SD)</b> | 67.53 (11.23)               | 70.77 (11.42)             | <0.001               |

| Variable                                 | Mortality Status            |                           | p-value <sup>2</sup> |
|------------------------------------------|-----------------------------|---------------------------|----------------------|
|                                          | 0, N = 220,829 <sup>1</sup> | 1, N = 6,258 <sup>1</sup> |                      |
| <b>NYHA, n (%)</b>                       |                             |                           | <0.001               |
| 0 – I                                    | 48,625 (22%)                | 1,055 (17%)               |                      |
| 1 – II                                   | 96,888 (44%)                | 1,609 (26%)               |                      |
| 2 – III                                  | 64,049 (29%)                | 2,228 (36%)               |                      |
| 3 – IV                                   | 11,267 (5.1%)               | 1,366 (22%)               |                      |
| <b>Renal impairment, n (%)</b>           |                             |                           | <0.001               |
| 0 - Normal                               | 103,196 (47%)               | 1,704 (27%)               |                      |
| 1 - Moderate                             | 92,411 (42%)                | 2,451 (39%)               |                      |
| 2 - On Dialysis                          | 2,187 (1.0%)                | 330 (5.3%)                |                      |
| 3 - Severe                               | 23,035 (10%)                | 1,773 (28%)               |                      |
| <b>Chronic lung disease, n (%)</b>       | 26,644 (12%)                | 1,211 (19%)               | <0.001               |
| <b>Poor mobility, n (%)</b>              | 8,305 (3.8%)                | 514 (8.2%)                | <0.001               |
| <b>Previous cardiac surgery, n (%)</b>   | 12,012 (5.4%)               | 1,141 (18%)               | <0.001               |
| <b>LV function</b>                       |                             |                           | <0.001               |
| 0 - Good (>50%)                          | 184,721 (84%)               | 4,706 (75%)               |                      |
| 1 - Moderate (31-50%)                    | 30,608 (14%)                | 1,089 (17%)               |                      |
| 2 - Poor (21-30%)                        | 4,241 (1.9%)                | 318 (5.1%)                |                      |
| 3 - Very Poor (≤20%)                     | 1,259 (0.6%)                | 145 (2.3%)                |                      |
| <b>Pulmonary hypertension, n (%)</b>     |                             |                           | <0.001               |
| 0 – PA Systolic (<31mmHg)                | 201,643 (91%)               | 5,000 (80%)               |                      |
| 1 – PA Systolic (31-55 mmHg)             | 13,126 (5.9%)               | 705 (11%)                 |                      |
| 2 – PA Systolic (>55mmHg)                | 6,060 (2.7%)                | 553 (8.8%)                |                      |
| <b>CCS class 4 angina, n (%)</b>         | 18,370 (8.3%)               | 956 (15%)                 | <0.001               |
| <b>Urgency, n (%)</b>                    |                             |                           | <0.001               |
| 0 - Elective                             | 141,617 (64%)               | 2,442 (39%)               |                      |
| 1 - Urgent                               | 72,090 (33%)                | 2,134 (34%)               |                      |
| 2 - Emergency                            | 6,533 (3.0%)                | 1,230 (20%)               |                      |
| 3 - Salvage                              | 589 (0.3%)                  | 452 (7.2%)                |                      |
| <b>Weight of the intervention, n (%)</b> |                             |                           | <0.001               |
| 0 – Isolated CABG                        | 111,243 (50%)               | 1,546 (25%)               |                      |

| Variable                                  | Mortality Status            |                           |                      |
|-------------------------------------------|-----------------------------|---------------------------|----------------------|
|                                           | 0, N = 220,829 <sup>1</sup> | 1, N = 6,258 <sup>1</sup> | p-value <sup>2</sup> |
| 1 – Single non-CABG                       | 62,568 (28%)                | 2,153 (34%)               |                      |
| 2 – 2 Procedures                          | 42,649 (19%)                | 2,108 (34%)               |                      |
| 3 – 3 Procedures                          | 4,369 (2.0%)                | 451 (7.2%)                |                      |
| <b>Diabetes on insulin, n (%)</b>         | 12,818 (5.8%)               | 453 (7.2%)                | <0.001               |
| <b>Female gender, n (%)</b>               | 59,467 (27%)                | 2,328 (37%)               | <0.001               |
| <b>Recent myocardial infarct, n (%)</b>   | 43,316 (20%)                | 1,594 (25%)               | <0.001               |
| <b>Critical preoperative state, n (%)</b> | 7,255 (3.3%)                | 1,382 (22%)               | <0.001               |
| <b>Extracardiac arteriopathy, n (%)</b>   | 22,327 (10%)                | 1,215 (19%)               | <0.001               |
| <b>Active endocarditis, n (%)</b>         | 5,816 (2.6%)                | 493 (7.9%)                | <0.001               |
| <b>Surgery on thoracic aorta, n (%)</b>   | 9,070 (4.1%)                | 896 (14%)                 | <0.001               |
| <b>Euroscore II, mean (SD)</b>            | 0.03 (0.04)                 | 0.12 (0.14)               | <0.001               |

<sup>1</sup>Mean (SD) or Frequency (%)

<sup>2</sup>Wilcoxon rank sum test; Pearson's Chi-squared test

781

782

783

784 **Table 2.** Geometric Mean of Individual metrics for each model in the Holdout set; CEM refers to Clinical  
785 Effective Metric; Standard deviation and 95% CI are shown for CEM. 1000 bootstrap samples were used  
786 to derive geometric mean of each metric; adjusted 1 - ECE and 1 - Brier score values are shown; net  
787 benefit is average absolute overall benefit across all thresholds.

| Model Category | 1 - ECE | AUC   | 1 - Brier | F1    | Net Benefit | CEM.Mean | CEM.sd | CEM.n | CEM lower CI | CEM upper CI |
|----------------|---------|-------|-----------|-------|-------------|----------|--------|-------|--------------|--------------|
| EuroSCORE II   | 0.641   | 0.800 | 0.814     | 0.240 | 0.461       | 0.541    | 0.004  | 1000  | 0.540        | 0.541        |
| LR             | 0.997   | 0.819 | 0.976     | 0.264 | 0.902       | 0.717    | 0.005  | 1000  | 0.717        | 0.717        |
| NN             | 0.997   | 0.813 | 0.976     | 0.259 | 0.901       | 0.713    | 0.006  | 1000  | 0.713        | 0.714        |
| RF             | 0.996   | 0.835 | 0.976     | 0.277 | 0.904       | 0.727    | 0.005  | 1000  | 0.727        | 0.728        |
| Weighted SVM   | 0.775   | 0.819 | 0.916     | 0.257 | 0.685       | 0.634    | 0.005  | 1000  | 0.634        | 0.634        |
| Xgboost        | 0.996   | 0.834 | 0.976     | 0.279 | 0.904       | 0.728    | 0.005  | 1000  | 0.728        | 0.729        |

788

789

790

791

792

793

794

795

796

797

798

799

800

801

802

803

804

805

806

807

808

809 **Table 3.** Dunnett's test with Xgboost as control and the rest of the models as comparison; 95% family-  
 810 wise confidence level are shown as well as mean difference in CEM and p-values.

| Group 1      | Group 2              | CEM Difference (1-2) | P Value    | 95% CI      |             |
|--------------|----------------------|----------------------|------------|-------------|-------------|
|              |                      |                      |            | Lower Bound | Upper Bound |
| EuroSCORE II |                      | -0.1876              | < 2e-16*** | -0.1881     | -0.1870     |
| LR           | Xgboost<br>(Control) | -0.0110              | < 2e-16*** | -0.0116     | -0.0105     |
| NN           |                      | -0.0148              | < 2e-16*** | -0.0154     | -0.0142     |
| RF           |                      | -0.0009              | 0.00039*** | -0.0015     | -0.0003     |
| Weighted SVM |                      | -0.0941              | < 2e-16*** | -0.0947     | -0.0935     |

811 Signif. codes: 0 '\*\*\*' 0.001 '\*\*' 0.01 '\*' 0.05 '.' 0.1 ' ' 1

812

813

814

815

816

817

818

819

820

821

822

823

824

825

826

827

828
